# Supplementary material
Source: PubMed Central journal article supplement (PMC7611632)
Supplement: EMS128829-supplement-Supplementary_Figure_S2.pdf [file EMS128829-supplement-Supplementary_Figure_S2.pdf]

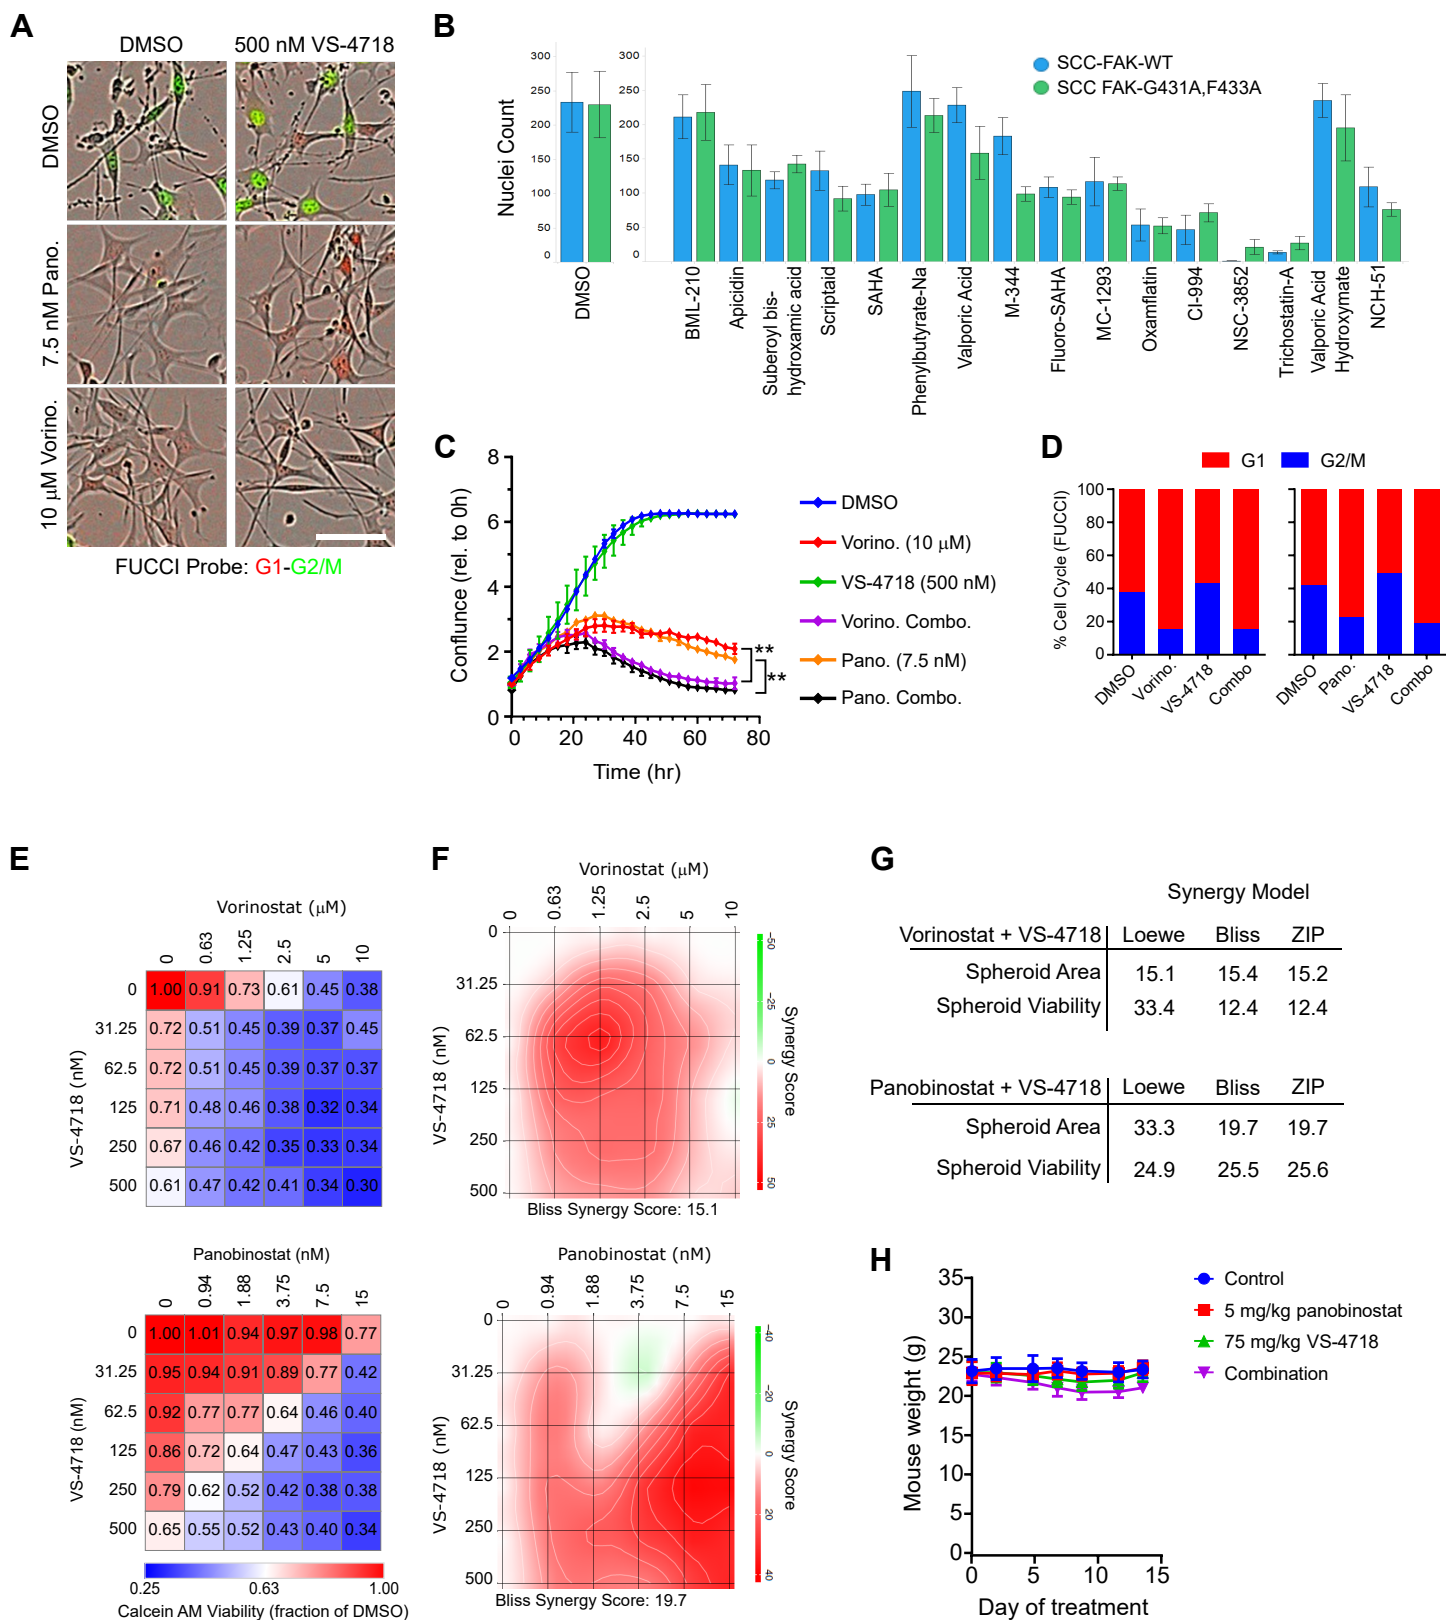

**Supplementary Figure S2.** Analysis of HDAC and FAK inhibition in SCC cells. **A**, SCC FAK-WT FUCCI cells treated with the indicated drugs for 24 hours. Red cells are in the G1 and green are G2/M phases of the cell cycle, respectively. Scale bar is 50 μm. **B**, Quantification of nuclei counts from compound screen. Mean  $\pm$  SD is shown ( $n = 6$  images). **C**, SCC FAK-WT cell confluence quantified using the Incucyte Zoom microscope. Mean cell confluence is displayed  $\pm$  SEM ( $n = 2$  independent experiments). NS, not significant. Statistical significance after 72 hours drug treatment was determined by one-way ANOVA followed by a Tukey's multiple comparison test. \*\*,  $P < 0.01$ . **D**, Quantification of cell cycle stage from FUCCI reporter at 24 hours post drug treatment. Mean population percentages of the cell cycle stage are shown ( $n = 2$  independent experiments). **E**, Drug treated SCC FAK-WT spheroid viability (Calcein AM) following vorinostat (top) or panobinostat (bottom) treatment in combination with VS-4718 for 7 days. ( $n = 3$  independent experiments) **F**, Example Bliss synergy map for SCC FAK-WT spheroid area and treated with vorinostat (top) and panobinostat (bottom) in combination with VS-4718. Calculated from mean spheroid area values shown in Fig. 2E. **G**, Summary table of synergy scores for Bliss, Loewe and ZIP models for HDAC and FAK inhibitor combinations. **H**, Mouse body weight following compound treatment from day 0. Mean  $\pm$  SD ( $n = 5$  mice per group). For **C**, **D**, **E** and **F**, data are normalized to DMSO.
