# Supplementary material
Source: PubMed Central journal article supplement (PMC7611632)
Supplement: EMS128829-supplement-Supplementary_Figure_S3.pdf [file EMS128829-supplement-Supplementary_Figure_S3.pdf]

**A**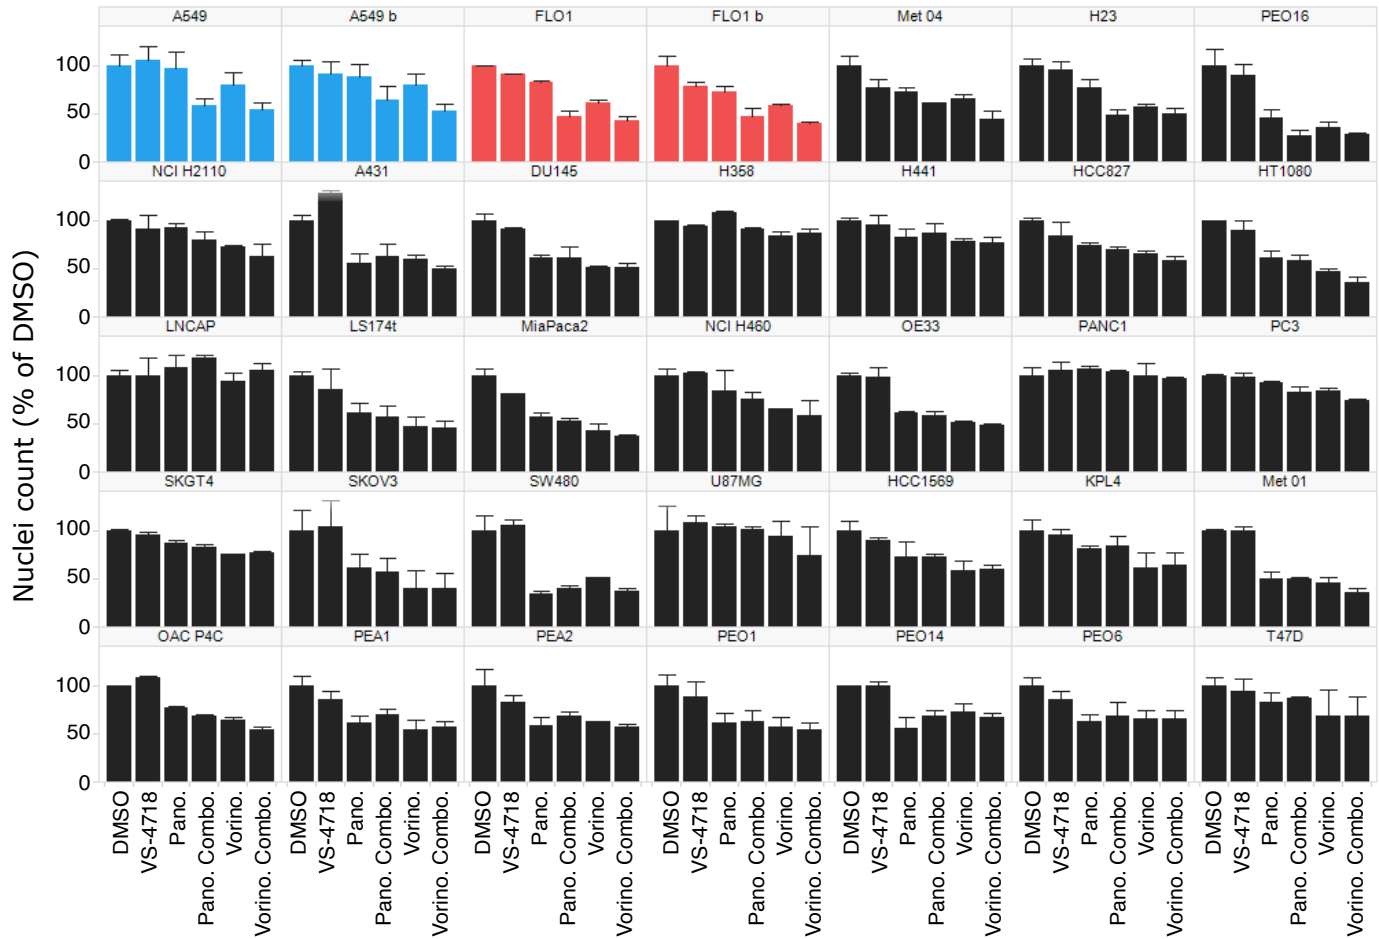**B**

| Cell Line | Tumor Type | Cell Line | Tumor Type |
|-----------|------------|-----------|------------|
| U87MG     | Brain      | OE33      | Esophageal |
| HCC827    | Breast     | SKGT4     | Esophageal |
| T47D      | Breast     | FLO1      | Esophageal |
| KPL-4     | Breast     | OAC-P4C   | Esophageal |
| HCC1569   | Breast     | PEO1      | Ovarian    |
| Met 01    | Skin       | PEO16     | Ovarian    |
| Met 04    | Skin       | PEA1      | Ovarian    |
| A431      | Skin       | PEA2      | Ovarian    |
| NCI H2110 | Lung       | PEO14     | Ovarian    |
| NCI H441  | Lung       | PEO6      | Ovarian    |
| NCI H23   | Lung       | SKOV3     | Ovarian    |
| NCI H358  | Lung       | PANC1     | Pancreas   |
| A549      | Lung       | MiaPaca2  | Pancreas   |
| NCI H460  | Lung       | PC3       | Prostate   |
| LS174t    | Colorectal | LnCap     | Prostate   |
| SW480     | Colorectal | DU145     | Prostate   |
|           |            | HT1080    | Connective |

**C**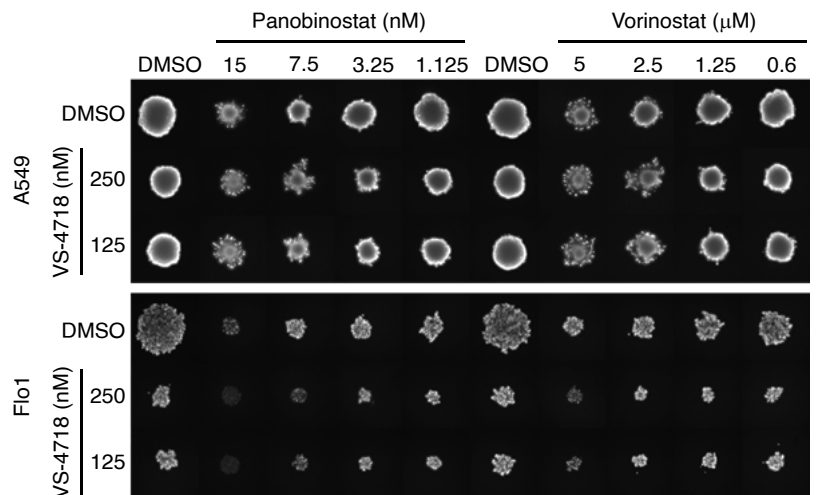

**Supplementary Figure S3.** Analysis of HDAC and FAK inhibition across a panel of 35 human cell lines. **A**, Cells were treated for 24 hours with drugs and Hoechst-labeled nuclei quantified. Drug concentrations used were VS-4718, 500 nM, panobinostat, 7.5 nM and vorinostat, 5  $\mu$ M. Two replicates for A549 (blue) and Flo1 (red) are shown. Nuclei number are normalized to DMSO and a mean is displayed  $\pm$  SD ( $n = 3$  replicate wells). **B**, Summary table of human cell lines screened. **C**, A549 and Flo1 cells were cultured as spheroids and treated with drugs for 7 days. Representative images of Calcein AM staining of viable cells in the spheroids are displayed.
