# Supplementary material
Source: PubMed Central journal article supplement (PMC7611632)
Supplement: EMS128829-supplement-Supplementary_Figure_S5.pdf [file EMS128829-supplement-Supplementary_Figure_S5.pdf]

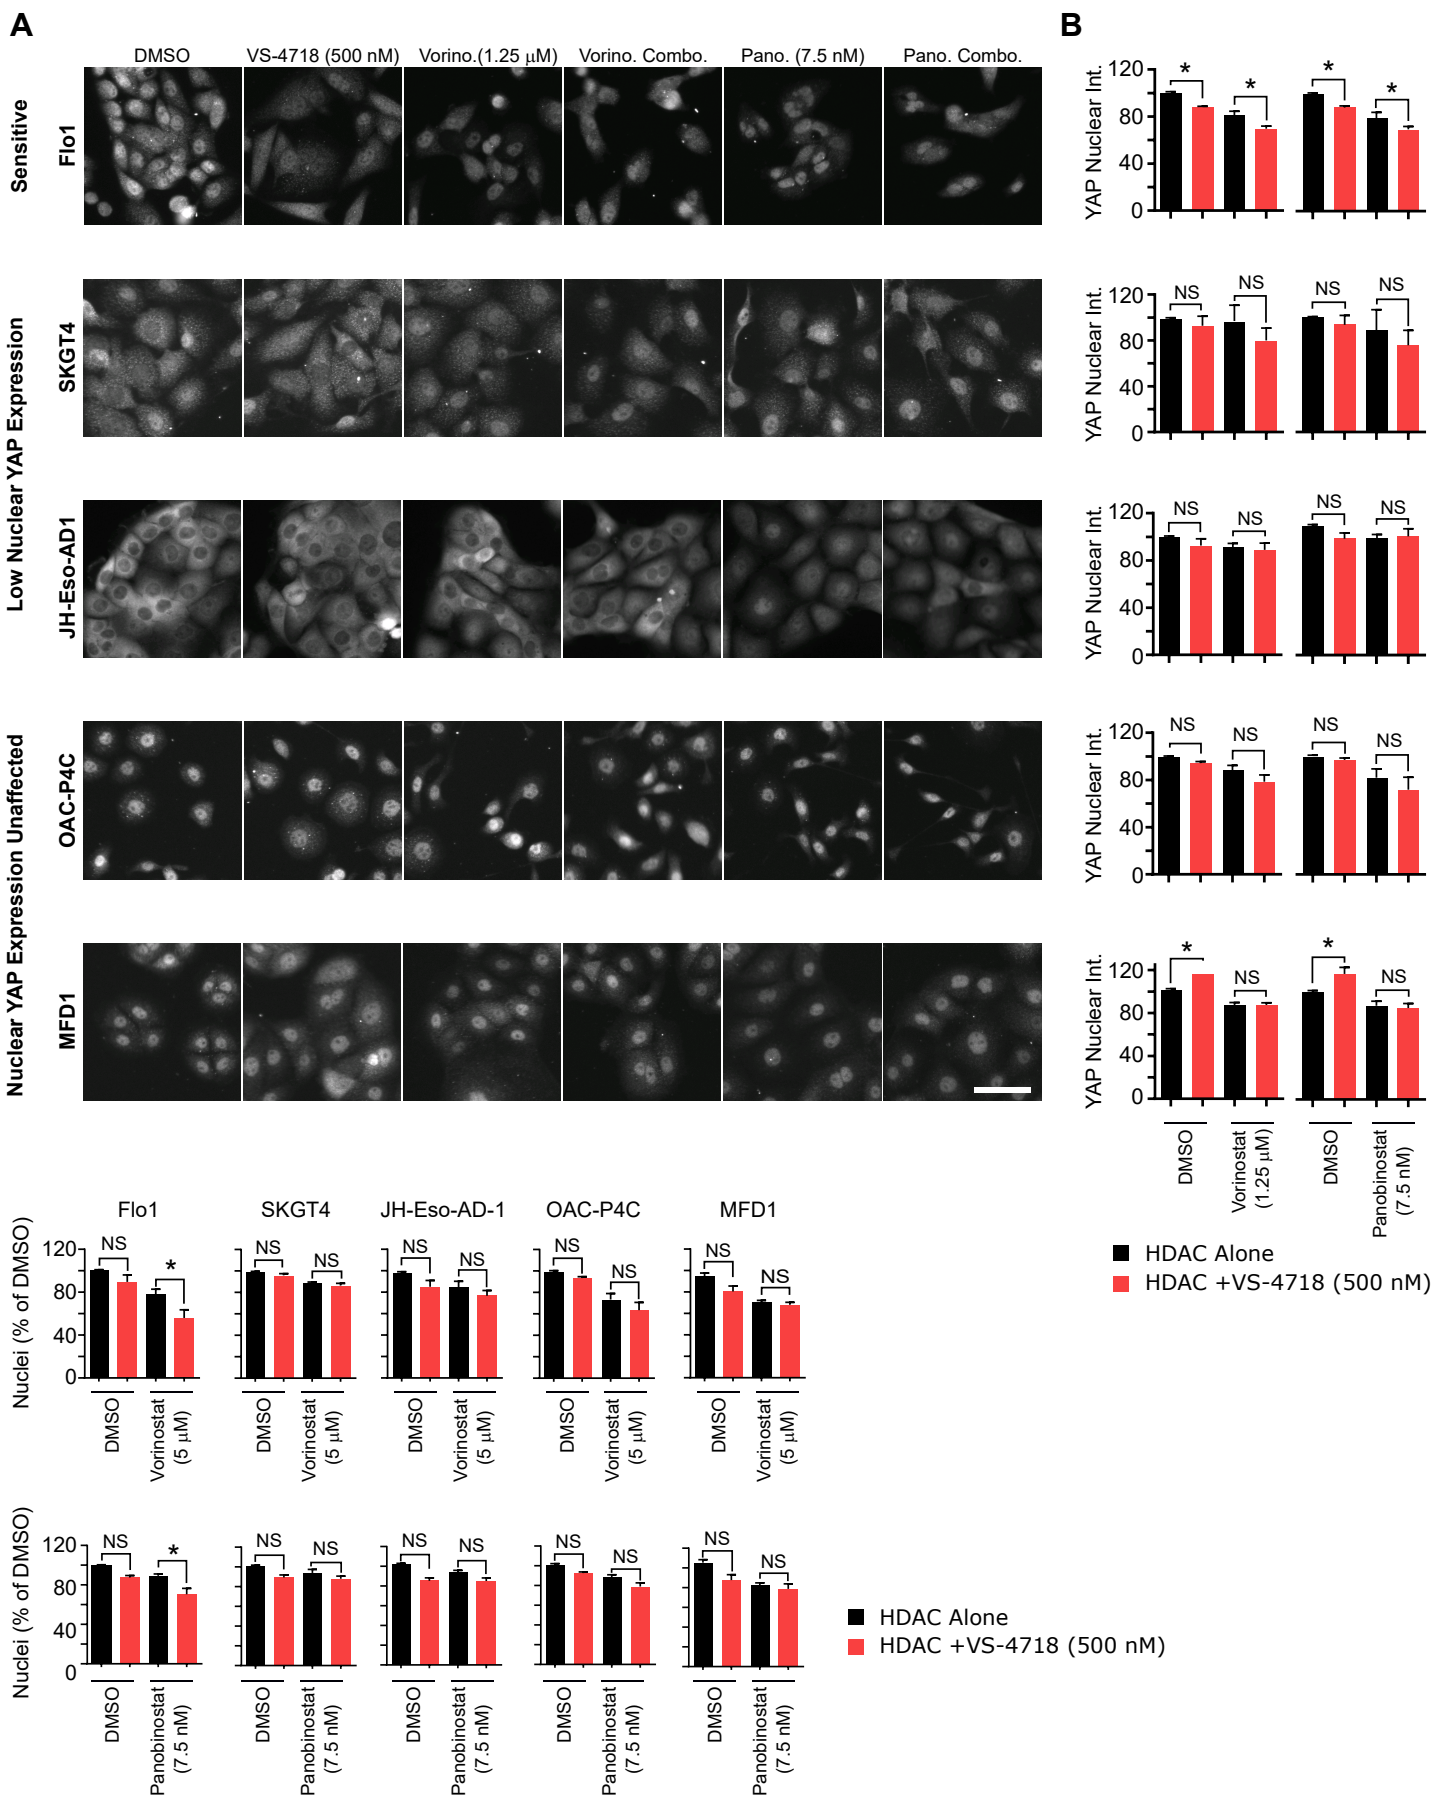

**Supplementary Figure S5.** Quantification of YAP localization in esophageal cell lines.

**A**, Immunolocalization of YAP in esophageal cell lines after 24 hours treatment with indicated compounds. **B**, Quantification of nuclear YAP fluorescence intensity. **C**, Quantification of esophageal cell growth, as measured by nuclei counts, following treatment with compound for 24 hours. Values in **B** and **C** are normalized to DMSO and displayed as mean  $\pm$  SEM ( $n = 3$  independent experiments). Statistical significance was assessed by one-way ANOVA. NS, not significant, \*,  $P < 0.05$ . Scale bar, 50  $\mu\text{m}$ .
